# Supplementary material for: Subclones in B-lymphoma cell lines: isogenic models for the study of gene regulation
Source: PubMed Central journal article supplement (PMC5325377; doi:10.18632/oncotarget.11524), 2016-08-23
Supplement: oncotarget-07-63456-s001.pdf [file oncotarget-07-63456-s001.pdf]

## Subclones in B-lymphoma cell lines: isogenic models for the study of gene regulation

### Supplementary Materials

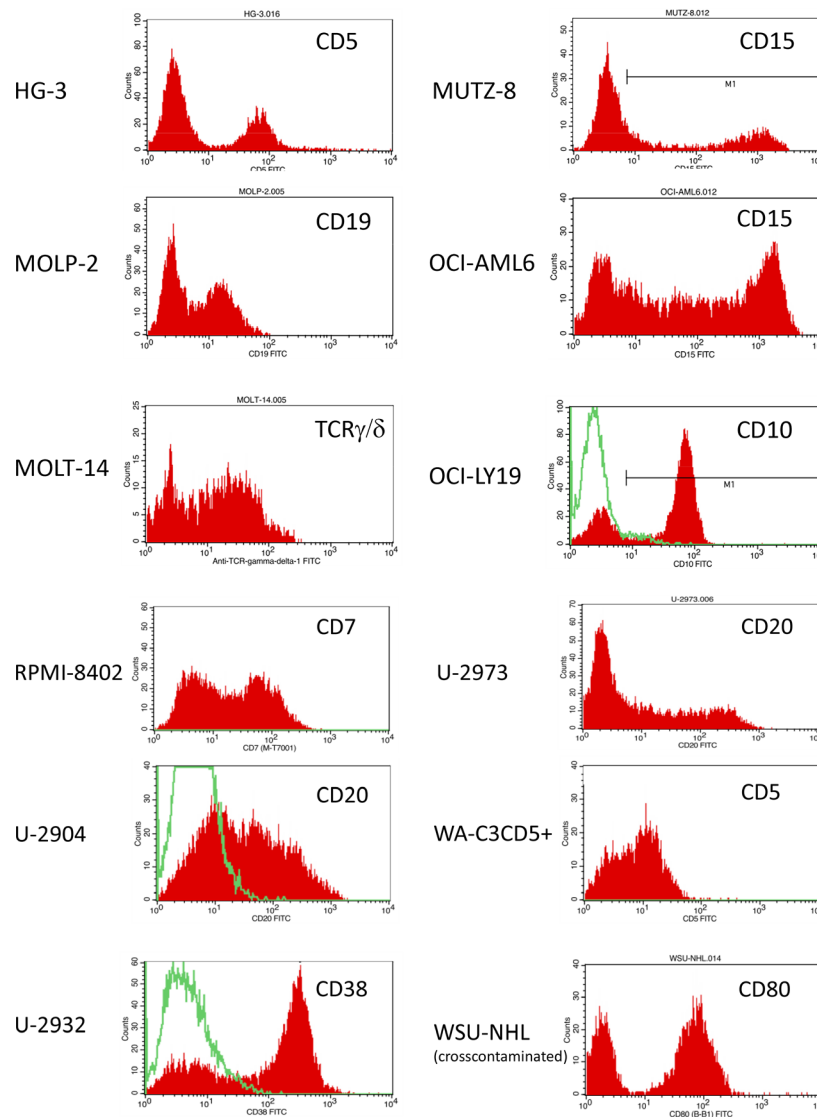

**Supplementary Figure S1: Bimodal surface markers expression.** Flow cytometry revealed bimodal expression surface markers on 12 cell lines of various hematopoietic lineages. The ratio of the individual populations (marker<sup>POS</sup> and marker<sup>NEG</sup>) is not always the same in different batches, indicating that the size of the populations is variable.

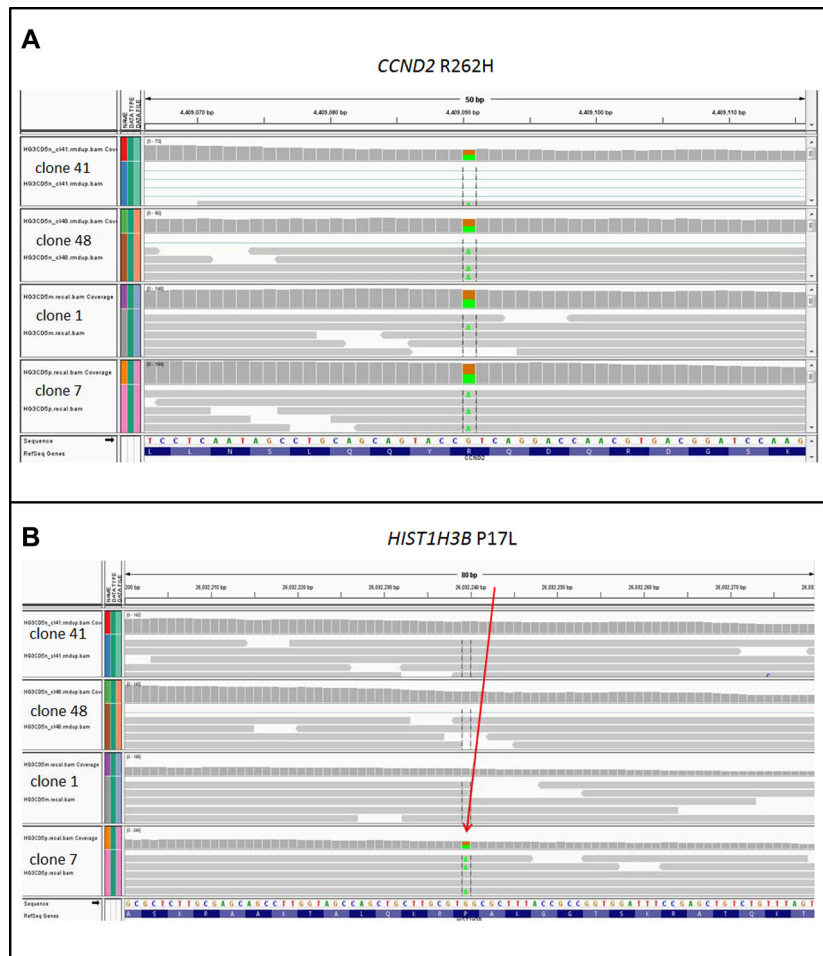

**Supplementary Figure S2: WES results.** (A) The *CCND2* R262H mutation was detected in all four single cell clones sequenced. The variant had been described as rare SNP (rs 142170178; MAF < 0.01). (B) The *HIST1H3B* P17L mutation (arrow) was found in one of the four single cell clones.

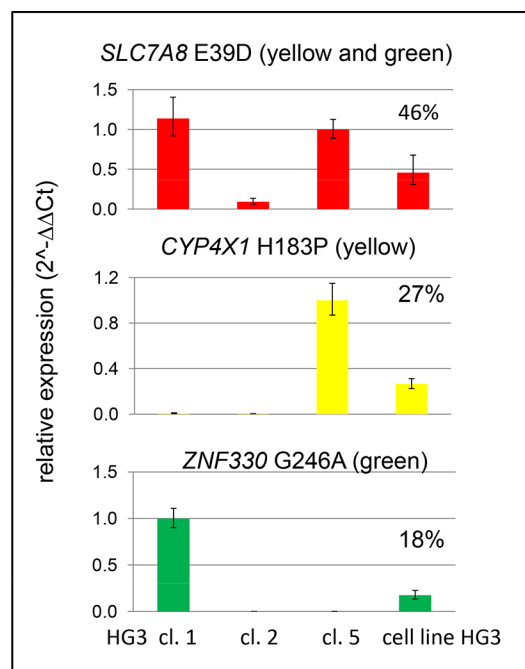

**Supplementary Figure S3: Lineage-specific quantitative genomic PCR.** Genomic qPCR was performed to assess the clonal composition of cell line HG3. Single cell clones carrying a specific mutation were used as reference.

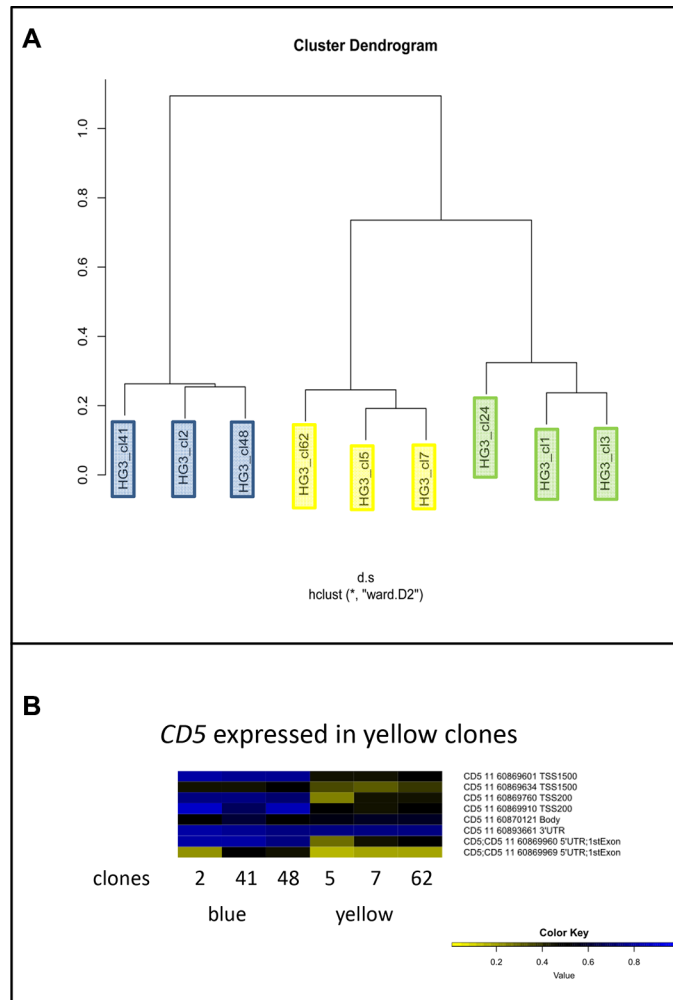

**Supplementary Figure S4: DNA methylation analysis.** (A) Methylation analysis reveals the same clonal structure of cell line HG3 as mutational analysis and expression array analysis (see Figure 4A, 4B). (B) Yellow clones are CD5<sup>+</sup>, blue clones are CD5<sup>-</sup>. Repression is accompanied by DNA methylation. Color code: blue (high methylation), yellow (low methylation).

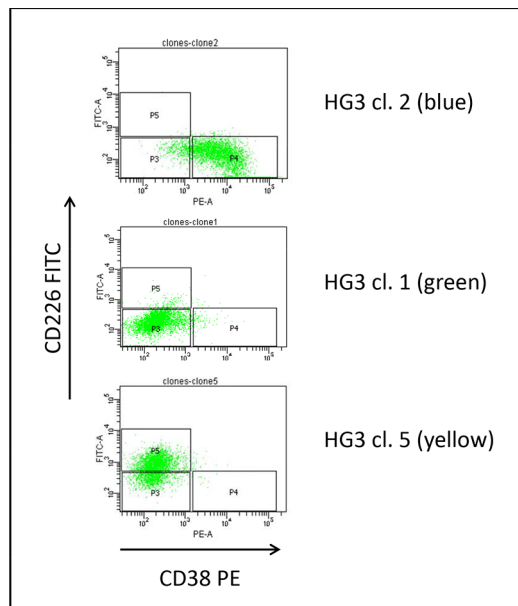

**Supplementary Figure S5: CD38 and CD226 expression on clones of cell line HG3.** Expression of surface antigens was determined using PE-labeled CD38 and FITC-labeled CD226 Abs.

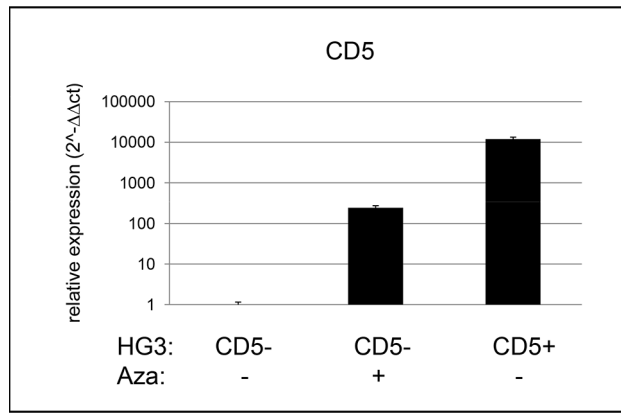

**Supplementary Figure S6: CD5 expression after DNA demethylation.** *CD5* mRNA expression of HG3 cells (CD5- population) was assessed by qPCR. Aza (5 μM) was given for 72 h.

**Supplementary Table S1: Ig hypermutation of B-lymphoma cell lines.** See Supplementary\_Table\_S1

**Supplementary Table S2: Cell lines with bimodal surface markers.** See Supplementary\_Table\_S2

**Supplementary Table S3: Subclone-characteristic mutations.** See Supplementary\_Table\_S3

**Supplementary Table S4: Clonal composition of cell line HG3.** See Supplementary\_Table\_S4

**Supplementary Table S5: Sequence of Ig rearrangement primers**

|              |         |                                             |
|--------------|---------|---------------------------------------------|
| VH1          | forward | 5'- GGC CTC AGT GAA GGT CTC CTG CAA G - 3'  |
| VH2          | forward | 5'- GTC TGG TCC TAC GCT GGT GAAA ACC C - 3' |
| VH3          | forward | 5'- CTG GGG GGT CCC TGA GAC TCT CCT G - 3'  |
| VH4          | forward | 5'- CTT CGG AGA CCC TGT CCC TCA CCT G - 3'  |
| VH5          | forward | 5'- CGG GGA GTC TCT GAA GAT CTC CTG T - 3'  |
| VH6          | forward | 5'- TCG CAG ACC CTC ACT CAC CTG TG - 3'     |
| JH concensus | reverse | 5'- CTT ACC TGA GGA GAC GGT GAC C - 3'      |

**Supplementary Table S6: Sequence of ARMS primers.** See Supplementary\_Table\_S6
